# Supplementary material
Source: PubMed Central journal article supplement (PMC6865456)
Supplement: HBM-40-4859-s001.pdf [file HBM-40-4859-s001.pdf]

Supporting information for manuscript titled “When I relive a positive me: vivid autobiographical memories facilitate auto-noetic brain activation and enhance mood”.

## SUPPORTING INFORMATION

The ability to use imagery was measured using the Spontaneous Use of Imagery Scale (SUIS) by assessing the frequency of using imagery in daily life (Nelis, Holmes, Griffith, & Raes, 2014; Reisberg, Pearson, & Kosslyn, 2003). This self-report scale consisted of 12 items rated on a scale from never appropriate (1) to always completely appropriate (5). The sum of the items was used to represent spontaneous imagery use (possible range: 12-60). The validity and reliability of this scale have been established (McCarthy-Jones, Knowles, & Rowse, 2012; Nelis et al., 2014). The internal consistency was good (Cronbach’s alpha = 0.84). This sample had an average ability to use imagery (M = 35.43, SD = 10.11).

## SUPPORTING TABLES

TABLE S 1.

Relation between predictors vividness and trait self-esteem to memory characteristics. For the relation with trait self-esteem multilevel analysis was used with trait self-esteem as second level and memory characteristic as first level variables. The chi square test is the result of the model comparison made between a baseline model where the memory characteristic is predicted by valence only and the model of interest where the memory characteristic is predicted by valence and trait self-esteem.

| Memory characteristic    | Vividness                               | Trait self-esteem                                                                         |
|--------------------------|-----------------------------------------|-------------------------------------------------------------------------------------------|
| Pleasantness             | $r = .40, p < .001$                     | $\chi^2(1) = 2.84, p = .092, t = 1.71,$<br>$b = 0.03, SE = 0.02, 95\% CI [-0.004, 0.06]$  |
| Remoteness               | $r = .28, p < .001$                     | $\chi^2(1) = 1.74, p = .188, t = -1.33,$<br>$b = -1.01, SE = 0.76, 95\% CI [-2.49, 0.51]$ |
| Word count               | $r = .13, p < .011$                     | $\chi^2(1) = 0.74, p = .391, t = 0.86,$<br>$b = 0.33, SE = 0.38, 95\% CI [-0.40, 1.06]$   |
| Specificity <sup>1</sup> | $\chi^2(1) = 0.001, p = .997, z = .004$ | $\chi^2(1) = 7.48, p = .006, z = 2.69$                                                    |
| Vividness                | -                                       | $\chi^2(1) = 3.41, p = .065, t = 1.88,$<br>$b = 0.04, SE = 0.02, 95\% CI [-0.003, 0.09]$  |

TABLE S 2.

Parameters of models predicting mood (significant effects in bold).

| Variable                    | Model 1: Valence |             |              |               |             | Model 2: Vividness |             |              |               |             | Model 3: Trait self-esteem |             |              |               |             |
|-----------------------------|------------------|-------------|--------------|---------------|-------------|--------------------|-------------|--------------|---------------|-------------|----------------------------|-------------|--------------|---------------|-------------|
|                             | <i>b</i>         | <i>SE</i>   | <i>t</i>     | <i>95% CI</i> |             | <i>b</i>           | <i>SE</i>   | <i>t</i>     | <i>95% CI</i> |             | <i>b</i>                   | <i>SE</i>   | <i>t</i>     | <i>95% CI</i> |             |
| Neutral valence (Intercept) | <b>1.38</b>      | <b>0.13</b> | <b>10.68</b> | <b>1.13</b>   | <b>1.64</b> | <b>1.33</b>        | <b>0.13</b> | <b>10.35</b> | <b>1.08</b>   | <b>1.59</b> | <b>1.38</b>                | <b>0.13</b> | <b>11.03</b> | <b>1.13</b>   | <b>1.63</b> |
| Positive valence            | <b>0.91</b>      | <b>0.08</b> | <b>10.77</b> | <b>0.75</b>   | <b>1.09</b> | <b>0.47</b>        | <b>0.13</b> | <b>3.55</b>  | <b>0.20</b>   | <b>0.73</b> | <b>0.91</b>                | <b>0.08</b> | <b>10.80</b> | <b>0.75</b>   | <b>1.08</b> |

<sup>1</sup> Tested using logistic multilevel analysis where specificity was the dependent variable recoded to non-specific vs specific.

Supporting information for manuscript titled “When I relive a positive me: vivid autobiographical memories facilitate auto-noetic brain activation and enhance mood”.

|                                                    |             |             |             |             |                                |
|----------------------------------------------------|-------------|-------------|-------------|-------------|--------------------------------|
| Vividness                                          | 0.05        | 0.05        | 1.06        | -<br>0.04   | 0.14                           |
| Vividness*<br>Valence<br>(positive ><br>neutral)   | <b>0.20</b> | <b>0.06</b> | <b>3.13</b> | <b>0.07</b> | <b>0.32</b>                    |
| Self-esteem                                        |             |             |             |             | 0.01 0.02 0.57 -<br>0.03 0.06  |
| Self-esteem*<br>Valence<br>(positive ><br>neutral) |             |             |             |             | 0.002 0.02 0.11 -<br>0.03 0.03 |

TABLE S 3.

Chi-square tests for models predicting mood during the RAM task with valence, vividness and trait self-esteem (*intra-class correlation = .44*).

| Effect                      | $\chi^2(df), p$               | AIC    | BIC    | Model                      |
|-----------------------------|-------------------------------|--------|--------|----------------------------|
| Null Model                  |                               | 1126.1 | 1137.8 |                            |
| + Valence                   | $\chi^2(1) = 99.3, p < .001$  | 1028.8 | 1044.5 | Model 1: Valence           |
| + Vividness                 | $\chi^2(1) = 15.01, p < .001$ | 1015.7 | 1035.4 |                            |
| + Vividness*Valence         | $\chi^2(1) = 9.54, p = .002$  | 1008.2 | 1031.8 | Model 2: Vividness         |
| + Trait self-esteem         | $\chi^2(1) = 0.41, p = .522$  | 1030.3 | 1050.0 |                            |
| + Trait self-esteem*Valence | $\chi^2(1) = 0.01, p = .913$  | 1032.3 | 1055.9 | Model 3: Trait self-esteem |

TABLE S 4.

Parameters of model predicting state self-esteem after the RAM task (significant effects in bold). Note: negative sign here indicates that mean state self-esteem at that time point is lower compared to after the RAM task.

| Variable                                              | <i>b</i>     | <i>SE</i>   | <i>t</i>     | 95% <i>CI</i>        |
|-------------------------------------------------------|--------------|-------------|--------------|----------------------|
| Intercept                                             | 72.66        | 1.94        | 37.38        | 68.80, 76.42         |
| <b>State self-esteem at baseline</b>                  | <b>-8.30</b> | <b>1.72</b> | <b>-4.82</b> | <b>-11.58, -4.93</b> |
| <b>State self-esteem before RAM</b>                   | <b>-6.49</b> | <b>1.72</b> | <b>-3.77</b> | <b>-9.79, -3.14</b>  |
| Trait self-esteem                                     | 0.49         | 0.35        | 1.38         | -0.21, 1.16          |
| Trait self-esteem*State self-esteem at baseline       | 0.56         | 0.31        | 1.79         | -0.07, 1.18          |
| <b>Trait self-esteem*State self-esteem before RAM</b> | <b>0.81</b>  | <b>0.31</b> | <b>2.58</b>  | <b>0.19, 1.42</b>    |

Supporting information for manuscript titled “When I relive a positive me: vivid autobiographical memories facilitate auto-noetic brain activation and enhance mood”.

TABLE S 5.

Chi-square tests for models of state self-esteem before and after the RAM task.

| Effect                                                            | $\chi^2(df), p$               | AIC    | BIC    |
|-------------------------------------------------------------------|-------------------------------|--------|--------|
| Null Model                                                        |                               | 1122.6 | 1131.5 |
| 1: + Baseline state self-esteem<br>+ before RAM state self-esteem | $\chi^2(2) = 21.33, p < .001$ | 1105.3 | 1120.1 |
| 2: + Trait self-esteem                                            | $\chi^2(1) = 8.80, p = .003$  | 1098.5 | 1116.2 |
| 3: + Trait self-esteem*Time                                       | $\chi^2(2) = 6.74, p = .034$  | 1095.8 | 1119.4 |

Supporting information for manuscript titled “When I relive a positive me: vivid autobiographical memories facilitate auto-noetic brain activation and enhance mood”.

**TABLE S 6.**

Cluster, peak voxel and label information of valence contrast. Positive vs neutral reliving: cluster corrected  $z = 3.1$ , cluster  $p < .05$ . Neutral vs positive reliving: permutation test with TFCE.

| Contrast                     | Cluster size | Cluster p-value | Cluster                         | Voxel                               | Label peak voxels                    | MNI coordinates |     |    |    |
|------------------------------|--------------|-----------------|---------------------------------|-------------------------------------|--------------------------------------|-----------------|-----|----|----|
|                              |              |                 | mean contrast value<br><i>t</i> | test value<br><i>Z</i>              |                                      | X               | Y   | Z  |    |
| Positive vs neutral reliving | 98           | 0.0418          |                                 | 4.18                                | R Precentral gyrus, BA3              | 28              | -26 | 68 |    |
|                              |              |                 |                                 | 3.57                                | R Postcentral gyrus                  | 38              | -26 | 60 |    |
|                              |              |                 |                                 | 3.46                                | R Precentral gyrus, BA4              | 32              | -26 | 56 |    |
|                              |              |                 |                                 | 3.38                                | R Precentral gyrus, BA4              | 38              | -22 | 70 |    |
|                              |              |                 |                                 | 3.36                                | R Precentral gyrus, BA4              | 38              | -20 | 66 |    |
|                              |              |                 |                                 | 3.19                                | R Precentral gyrus                   | 42              | -16 | 64 |    |
|                              |              | 96              | 0.0455                          |                                     | 3.94                                 | L ACC           | -6  | 40 | -2 |
|                              |              |                 |                                 | 3.92                                | L Paracingulate gyrus                | -14             | 40  | 0  |    |
|                              |              |                 |                                 | 3.47                                | L ACC                                | -4              | 44  | 4  |    |
|                              |              |                 |                                 | 3.41                                | L Paracingulate gyrus, BA32          | -2              | 50  | 0  |    |
|                              |              |                 |                                 | 3.22                                | L Paracingulate gyrus, mPFC, BA32    | -4              | 48  | -4 |    |
|                              |              |                 | 3.19                            | L Paracingulate gyrus, frontal pole | -6                                   | 54              | 2   |    |    |
| Neutral vs positive reliving | 1755         | <.001           | 3.64                            |                                     | R Precuneus                          | 16              | -66 | 26 |    |
|                              | 984          | <.001           | 3.82                            |                                     | L Supramarginal gyrus, Angular gyrus | -40             | -48 | 38 |    |
|                              | 589          | 0.009           | 3.41                            |                                     | R Angular gyrus, IPLC, IPLD, BA40    | 52              | -48 | 42 |    |
|                              | 318          | <.001           | 4.19                            |                                     | L PCC, BA23                          | -2              | -28 | 30 |    |

**TABLE S 7.**

Cluster, peak voxel and label information of contrast on vividness (permutation test with tfce) and trait self-esteem (cluster corrected  $z = 2.3$ , cluster  $p < .05$ ). Contrasts on vividness during neutral memories did not result in above threshold activations.

| Contrast                      | Cluster size | Cluster max p-value | Cluster                         | Voxel                  | Label peak voxels              | MNI coordinates |     |     |
|-------------------------------|--------------|---------------------|---------------------------------|------------------------|--------------------------------|-----------------|-----|-----|
|                               |              |                     | mean contrast value<br><i>t</i> | test value<br><i>Z</i> |                                | X               | Y   | Z   |
| Vividness (positive relation) | 1827         | 0.004               | 3.27                            |                        | R Temporal pole, BA22          | 56              | 10  | -4  |
|                               |              |                     |                                 |                        | R Hippocampus                  | 32              | -42 | 6   |
|                               | 74           | 0.024               | 3.61                            |                        | R Postcentral gyrus, IPLA, BA3 | 54              | -12 | 46  |
|                               |              |                     |                                 |                        | L Hippocampus, Amygdala        | -28             | -16 | -14 |
|                               | 1            | 0.049               | 3.30                            |                        | R Amygdala                     | 14              | -14 | -14 |
| Vividness (negative relation) | 12880        | <.001               | 3.17                            |                        | L Occipital pole               | -26             | -92 | -16 |



Supporting information for manuscript titled “When I relive a positive me: vivid autobiographical memories facilitate auto-noetic brain activation and enhance mood”.

## SUPPORTING FIGURES

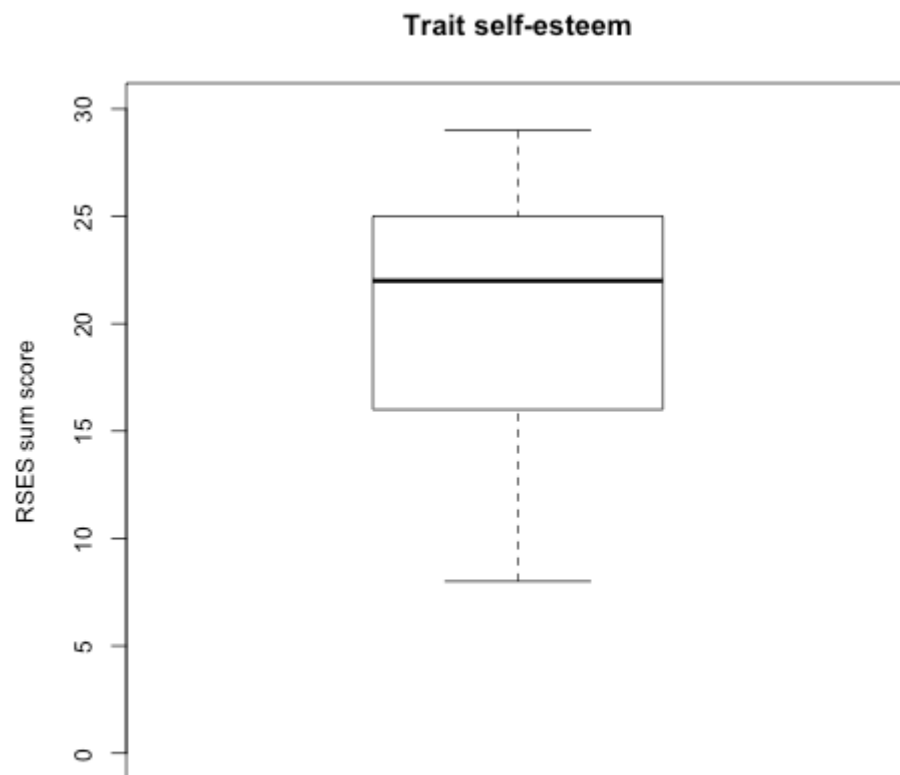

FIG. S 1. Depiction of the distribution of trait self-esteem as measured by the sum score on the Rosenberg self-esteem scale.

Supporting information for manuscript titled “When I relive a positive me: vivid autobiographical memories facilitate auto-noetic brain activation and enhance mood”.

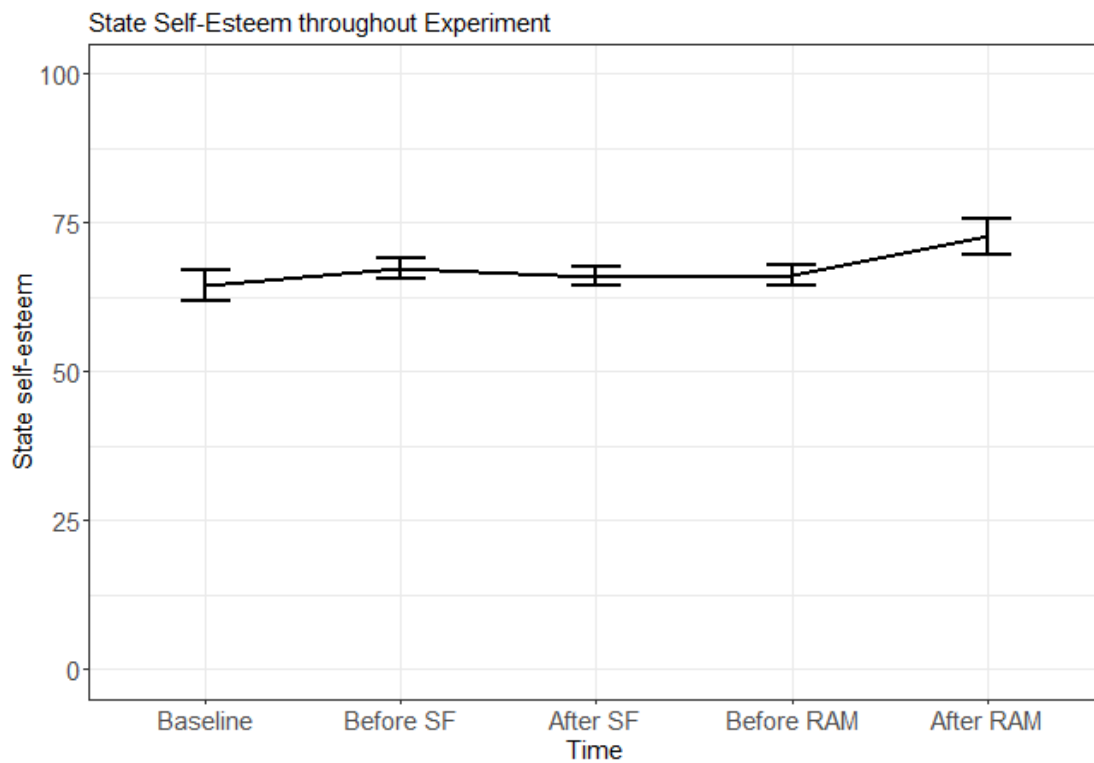

FIG. S 2.

State self-esteem measured at different time points before and after the tasks and at baseline before entering the scanner. Error bars represent 95% confidence intervals. Before the RAM task, participants performed the social feedback (SF) task in which they were introduced to a confederate to the study who supposedly provided mixed positive, intermediate and negative personal feedback (see full description in (van Schie et al., 2018)). In terms of state self-esteem, the SF task had no carryover effect. The social feedback influenced state self-esteem neither after the SF task ( $\chi^2(2) = 4.89, p = .087$ ) nor before the RAM task ( $\chi^2(2) = 1.11, p = .292$ ) compared to before the SF task and with baseline state self-esteem taken into account.

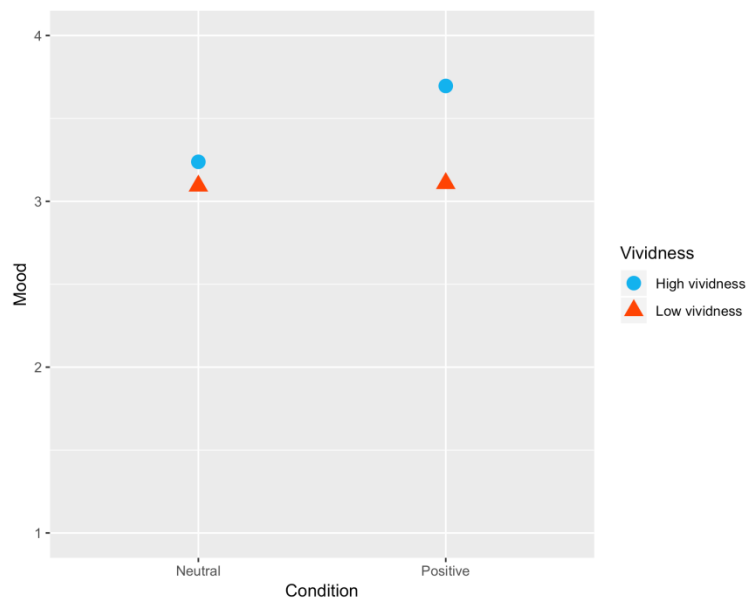

FIG. S 3.

Depiction of mood levels at low (1) and high (4) vividness ratings illustrating the interaction of valence by vividness on mood.

Supporting information for manuscript titled “When I relive a positive me: vivid autobiographical memories facilitate auto-noetic brain activation and enhance mood”.

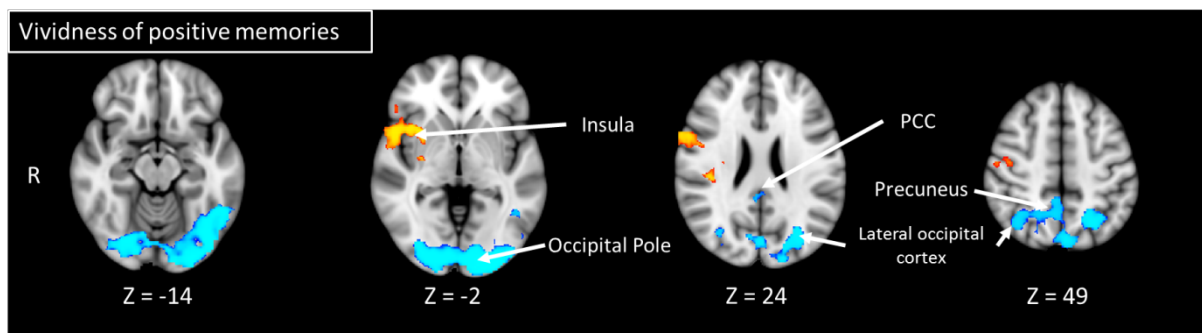

FIG. S 4.

Activation positively (red) and negatively (blue) related to vividness during positive memories only. There was no significant activation for vividness during neutral memories only. Note: brain is depicted in radiological convention, i.e., left = right.

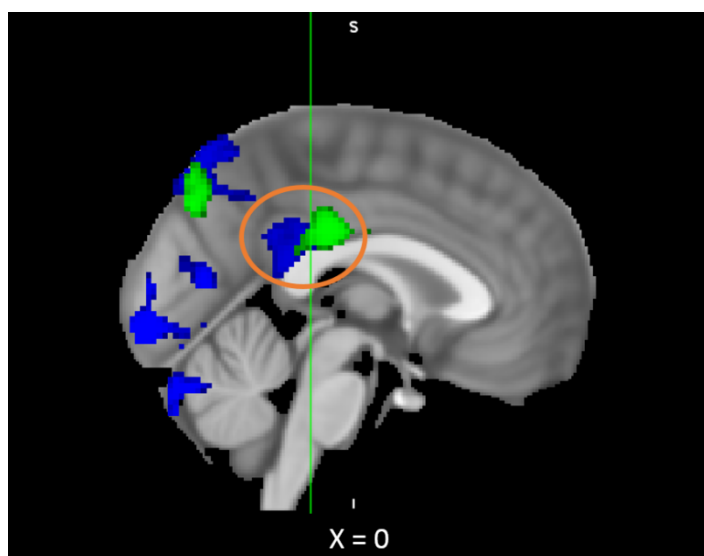

FIG. S 5.

Depiction of overlap between the negative relation of vividness (blue) and activation of neutral more than positive reliving (green) (green orientation ruler at  $y = -33$ ). Of interest is the region circled in orange which shows that vividness is negatively related to a more caudal part of the PCC whereas neutral compared to positive memory reliving is related to a more rostral PCC/MCC area.
